# Supplementary material
Source: publisher figshare collection journal article supplement (https://acs.figshare.com/ndownloader/files/4555477)
Supplement: Supplementary file 1 [file 4555477]

**Supporting information**

**Rows**

1

2

3

4

5

6

7

8

9

10

11

**Figure S1.** Plan of the olive cultivar collection orchard (Agricultural Research Station, Agios Mamas, Chalkidiki, Greece). The four angles of each parallelogram represent the planting position of the olive trees. Leaf sampling was from parallelograms indicated with dots. Parallelograms filled with a cross did not contain olive trees.


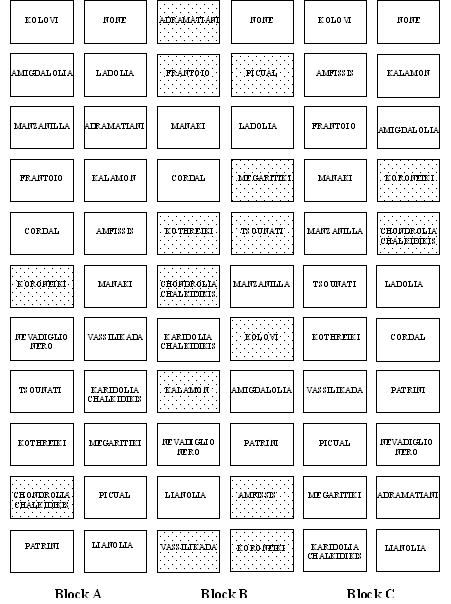


**Table S1.** Morphological characteristics and moisture content of mature leaves (ML) collected for the study of “cultivar” effect; experimental orchard Agricultural Research Station, Agios Mamas, Chalkidiki, Greece; A, B and C correspond to orchard blocks

| ***cultivar / block no*** | **length (cm)a** | | **width (cm) a** | | **mean weight (g) / dry leaf a** | **moisture content %** |
| --- | --- | --- | --- | --- | --- | --- |
| ***December 2006 sampling*** | | | | | | |
| ***Adramatiani / B*** | 6.6 ± 0.9 | | 1.5 ± 0.2 | | 0.2 | 51 |
| ***Amfissis / B*** | 7.5 ± 0.9 | | 1.7 ± 0.2 | | 0.3 | 50 |
| ***/ Α*** | 6.1 ± 0.7 | | 1.2 ± 0.3 | | 0.2 | 48 |
| ***Chondrolia Ch. / B*** | 5.6 ± 0.6 | | 1.0 ± 0.1 | | 0.2 | 48 |
| ***/ C*** | 6.3 ± 0.7 | | 1.1 ± 0.2 | | 0.2 | 45 |
| ***Kalamon / B*** | 8.7 ± 2.0 | | 2.1 ± 0.5 | | 0.4 | 49 |
| ***Kolovi / B*** | 6.6 ± 0.9 | | 1.5 ± 0.3 | | 0.2 | 50 |
| ***/ A*** | 5.2 ±0.6 | | 1.1 ± 0.3 | | 0.2 | 54 |
| ***Koroneiki / B*** | 6.0 ± 1.0 | | 1.4 ± 0.4 | | 0.2 | 52 |
| ***/ C*** | 5.7 ± 0.8 | | 1.3 ± 0.3 | | 0.2 | 54 |
| ***Κοthreiki / B*** | 5.8 ± 0.7 | | 1.5 ± 0.2 | | 0.2 | 59 |
| ***Megaritiki / B*** | 7.4 ± 1.4 | | 1.4 ± 0.3 | | 0.2 | 49 |
| ***Tsounati / B*** | 7.0 ± 1.3 | | 1.2 ± 0.2 | | 0.2 | 50 |
| ***Vassilikada / B*** | 7.2 ± 0.9 | | 1.4 ± 0.2 | | 0.2 | 50 |
| ***Frantoio / B*** | 6.3 ± 0.4 | | 1.7 ± 0.3 | | 0.2 | 51 |
| ***Picual / B*** | 6.0 ± 0.4 | | 1.3 ± 0.1 | | 0.2 | 49 |
| ***February 2008 sampling*** | | | | | | |
| ***Adramatiani / B*** | | 5.6 ± 0.6 | | 1.2 ± 0.1 | 0.2 | 43 |
| ***Amfissis / B*** | | 8.2 ± 0.8 | | 1.7 ± 0.3 | 0.3 | 48 |
| ***Chondrolia Ch. / B*** | | 6.6 ± 0.9 | | 1.5 ± 0.2 | 0.2 | 40 |
| ***Koroneiki / B*** | | 6.5 ± 0.4 | | 1.3 ± 0.1 | 0.2 | 51 |
| ***Vassilikada / B*** | | 7.7 ± 0.7 | | 1.6 ± 0.2 | 0.3 | 50 |

**a***mean values ± standard deviation (n=*15*).*

**Table S2.** Morphological characteristics and moisture content of new, mature, old and yellow leaves (Chondrolia Ch.cv) of October 2007 and April 2008 sampling periods, collected for the study of “leaf age” effect; experimental orchard, Aristotle University of Thessaloniki, Greece

| ***leaf age*** | **length (cm)a** | **width (cm) a** | **mean weight (g) / dry leaf a** | **moisture content %** |
| --- | --- | --- | --- | --- |
| ***October 2007 sampling*** | | | | |
| *new* | 5.8 ± 0.9 | 1.0 ± 0.2 | 0.1 | 42 |
| *mature* | 6.4 ± 0.9 | 1.2 ± 0.2 | 0.1 | 39 |
| *old* | 6.7 ± 0.6 | 1.3 ± 0.2 | 0.1 | 43 |
| *yellow* | 6.2 ± 0.5 | 1.1 ± 0.3 | 0.1 | 48 |
| ***April 2008 sampling*** | | | | |
| *new* | 5.9 ± 0.6 | 1.1 ± 0.1 | 0.1 | 46 |
| *mature* | 6.7 ± 0.7 | 1.4 ± 0.2 | 0.1 | 45 |
| *old* | 7.2 ± 0.9 | 1.4 ± 0.2 | 0.1 | 45 |
| *yellow* | 6.0 ± 0.7 | 1.2 ± 0.2 | 0.1 | 50 |

**a***mean values ± standard deviation (n=*15*).*

**Table S3.** Morphological characteristics and moisture content of new leaves from Chondrolia Ch. and Koroneiki cv, collected from June to November (2006) for the study of “sampling date” effect; experimental orchard Agricultural Research Station, Agios Mamas, Chalkidiki, Greece

| ***sampling date*** | **length (cm)a** | **width (cm) a** | **mean weight (g) / dry leaf a** | **moisture content %** |
| --- | --- | --- | --- | --- |
| ***Chondrolia Ch.*** | | | | |
| ***June 15th*** | 4.6 ± 0.6 | 0.9 ± 0.1 | 0.1 | 56 |
| ***July 31st*** | 5.6 ± 0.7 | 1.0 ± 0.1 | 0.1 | 47 |
| ***August 21st*** | 5.5 ± 0.8 | 0.9 ± 0.2 | 0.1 | 44 |
| ***September 11th*** | 5.4 ± 1.3 | 0.9 ± 0.2 | 0.1 | 46 |
| ***October 17th*** | 5.0 ± 0.8 | 0.9 ± 0.2 | 0.1 | 49 |
| ***November 29th*** | 5.6 ± 0.8 | 1.0 ± 0.1 | 0.1 | 50 |
| ***Koroneiki*** | | | | |
| ***June 15th*** | 5.4 ± 0.7 | 1.0 ± 0.1 | 0.1 | 62 |
| ***July 31st*** | 5.6 ± 0.7 | 1.0 ± 0.1 | 0.1 | 50 |
| ***August 21st*** | 5.3 ± 0.5 | 1.0 ± 0.1 | 0.1 | 48 |
| ***September 11th*** | 5.2 ± 0.4 | 0.9 ± 0.1 | 0.1 | 47 |
| ***October 17th*** | 4.8 ± 0.9 | 0.9 ± 0.1 | 0.1 | 59 |
| ***November 29th*** | 5.7 ± 0.8 | 1.1 ± 0.2 | 0.1 | 55 |

**a***mean values ± standard deviation (n=*15*).*
